# Supplementary material for: CMK3/graphene-N-Co – a low-cost and high-performance catalytic system
Source: Royal Society of Chemistry journal article supplement (doi:10.1039/c4ta06184e), 2014-11-28
Supplement: c4ta06184e1.pdf [file c4ta06184e1.pdf]

## Supporting Information

### CMK3/ Graphene-N-Co, a low-cost and high-performance catalytic system

Xiang-Jun Huang <sup>a</sup>, Yi-Guo Tang <sup>a</sup>, Long-Fei Yang <sup>a</sup>, Ping Chen <sup>a,\*</sup>, Qing-Sheng Wu <sup>b,\*</sup>, Zhen Pan <sup>a</sup>

<sup>a</sup> School of Chemistry and Chemical Engineering, Anhui University, Hefei, Anhui, 230601, P. R. China

<sup>b</sup> Department of Chemistry; Key Laboratory of Yangtze River Water Environment, Ministry of Education, Tongji University, Shanghai 200092, P. R. China

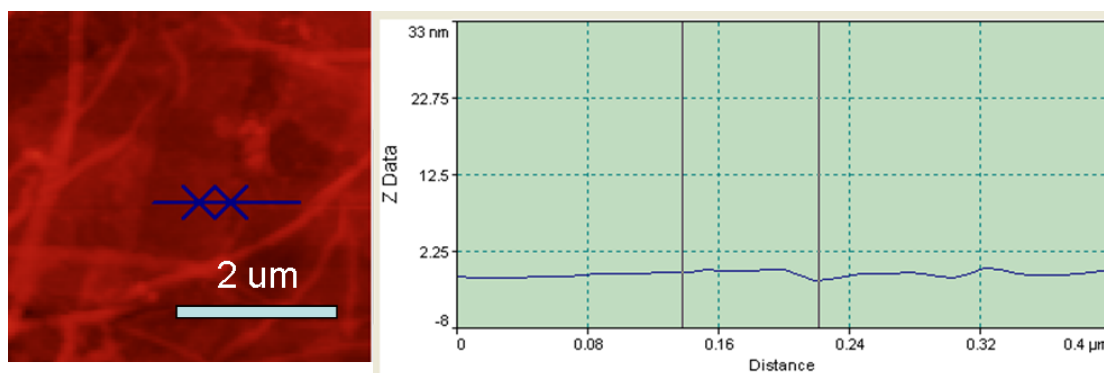

Figure S1. AFM height images of GO.

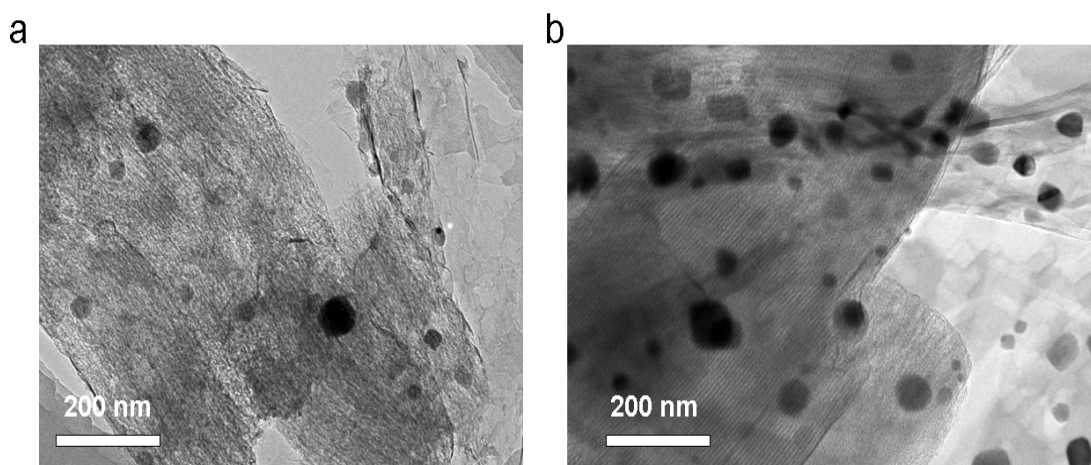

Figure S2. TEM images of the CMK3/G-N-Co with Co content of 0.8 wt% (a) and 4.0 wt.% (b)

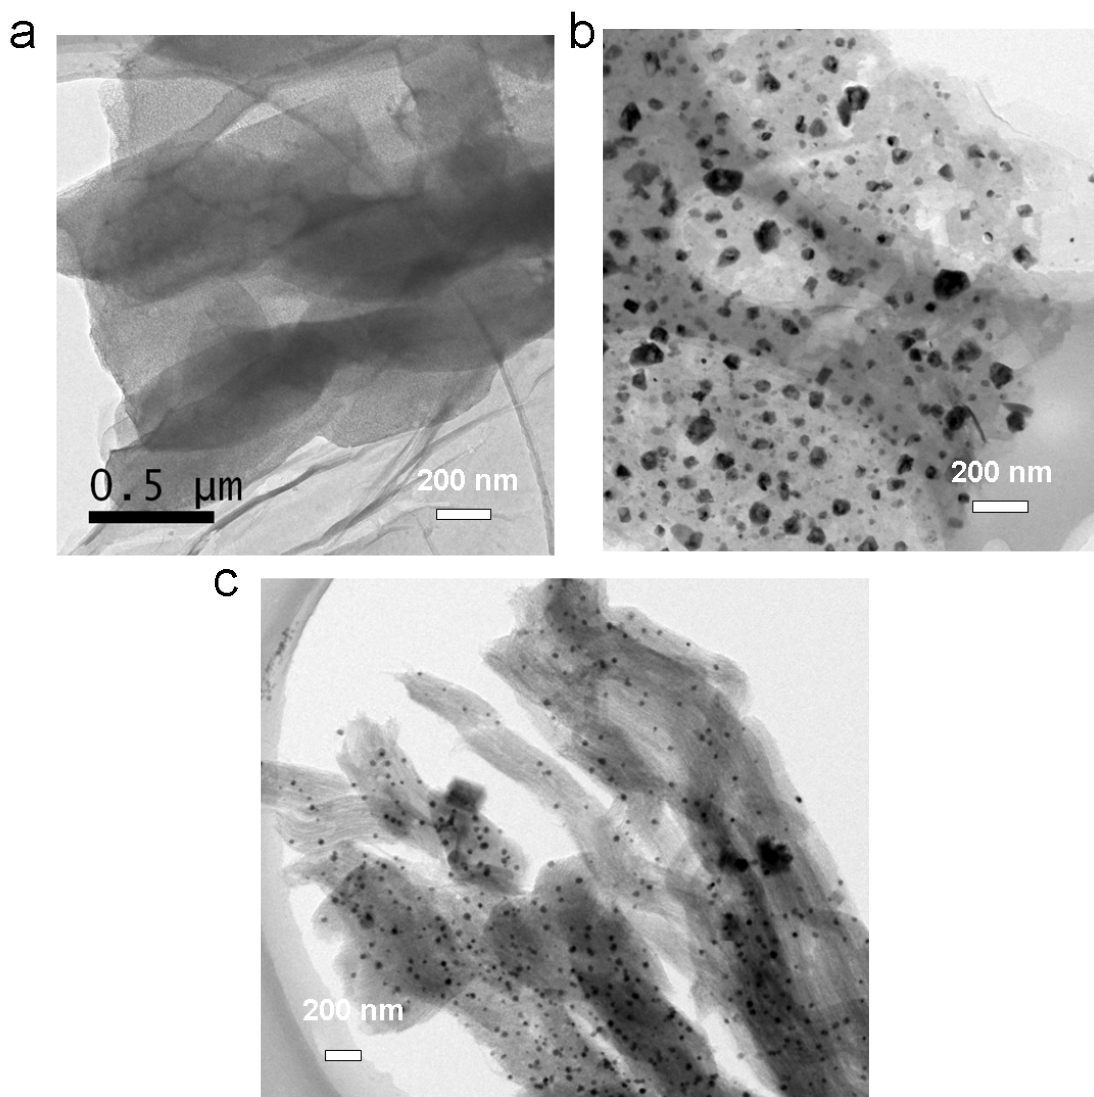

Figure S3. TEM images of the CMK3/G-N (a), G-N-Co (b) and CMK3-N-Co (c)

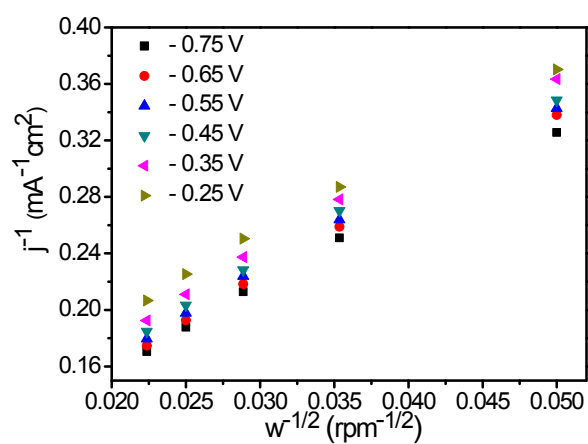

Figure S4. K-L plots at different electrode potentials for the typical CMK3/G-N-Co

---

**Table S1** Percentage of cobalt element in the form of doping in the CMK3/G (%) and in the form of nanoparticles (%)

| Products            | Percentage of cobalt element in the form of doping in the CMK3/G (%) | Percentage of cobalt element in the form of nanoparticles (%) |
|---------------------|----------------------------------------------------------------------|---------------------------------------------------------------|
| P1, 850 °C, 50 min  | 26.4                                                                 | 73.6                                                          |
| P2, 900 °C, 50 min  | 12.4                                                                 | 87.6                                                          |
| P3, 950 °C, 50 min  | 11.6                                                                 | 88.4                                                          |
| P4, 1000 °C, 50 min | 14.2                                                                 | 85.8                                                          |
| P5, 950 °C, 20 min  | 15.6                                                                 | 84.4                                                          |
| P6, 950 °C, 30 min  | 11.9                                                                 | 88.1                                                          |
